# Supplementary material for: The international dataset on the association between Langerhans Cell Histiocytosis and other malignancies
Source: PubMed Central journal article supplement (PMC9519425; doi:10.1016/j.dib.2022.108604), 2022-09-15
Supplement: mmc1.pdf [file mmc1.pdf]

# LANGERHANS CELL HISTIOCYTOSIS - MALIGNANCY STUDY

## Patient's data

ID code     Center \_\_\_\_\_ Country \_\_\_\_\_

Sex:  M  F (M=Male; F=Female)

Ethnicity:  (1=Asian; 2=White; 3=Black; 4=Hispanic; 5=Other) If Other, specify: \_\_\_\_\_

## Langerhans cell histiocytosis

Age at LCH diagnosis (yrs)

Date of LCH diagnosis:       Extension:    
1 = Single system / Single site  
 2 = Single system / Multiple site  
 3 = Multi system

### 1. Systems involved (check all that apply)

Bone  Skin  Lymph  Diabetes Insipidus  Liver   
 Spleen  Lungs  Bone Marrow  Oral Soft Tissue  GI  CNS   
 Other:  \_\_\_\_\_

System biopsed?  N  Y if yes, specify system(s):  
 System \_\_\_\_\_ System \_\_\_\_\_ System \_\_\_\_\_ System \_\_\_\_\_

### 2. Histology (please, enclose histopathology forms/electron microscopy results/results of monoclonal antibodies)

|          | Light microscopy         | S100                     | ATP-ase                  | Pean Lect                | Alfa-D-Mann              | Birbek                   | OKT6/CD1a                |
|----------|--------------------------|--------------------------|--------------------------|--------------------------|--------------------------|--------------------------|--------------------------|
| positive | <input type="checkbox"/> | <input type="checkbox"/> | <input type="checkbox"/> | <input type="checkbox"/> | <input type="checkbox"/> | <input type="checkbox"/> | <input type="checkbox"/> |
| negative | <input type="checkbox"/> | <input type="checkbox"/> | <input type="checkbox"/> | <input type="checkbox"/> | <input type="checkbox"/> | <input type="checkbox"/> | <input type="checkbox"/> |
| not done | <input type="checkbox"/> | <input type="checkbox"/> | <input type="checkbox"/> | <input type="checkbox"/> | <input type="checkbox"/> | <input type="checkbox"/> | <input type="checkbox"/> |

### 3. Treatment (check all that apply)

Treatment?  N  Y if yes, specify:  
**Surgery/Curettage**  N  Y  
**Radiation**  N  Y if yes, specify:  
 dosage applied (cGy):     Site / Field \_\_\_\_\_  
 dosage applied (cGy):     Site / Field \_\_\_\_\_  
 dosage applied (cGy):     Site / Field \_\_\_\_\_

**Steroids:**  N  Y if yes, specify:  
 Oral  IV  Local  Intralesional

**Chemotherapy:**  N  Y if yes, specify:  
 VBL  VCR  VP16   
 Chlorambucil  MTX  Others \_\_\_\_\_

**Immunotherapy:**  N  Y if yes, specify:  
 alfa-IFN  Cyclosporine  Others \_\_\_\_\_

Starting date therapy:       Ending date last therapy:

#### 4. Duration of LCH disease and follow-up

Remission  N  Y

Date of 1<sup>st</sup> remission:        
dd mm yy

Relapse  N  Y

N° relapses:

Date of 1<sup>st</sup> relapse:        
dd mm yy

#### Associated malignancy

Date of malignancy diagnosis:        
dd mm yy

Age at malignancy (yrs)

#### 5. Diagnosis

Histology / Cytogenetics / Cell markers  
(Please, enclose documentation)

Stage / Extent of disease / Site of disease:

Did the malignancy occur within previous radiation port?

Yes  No  Don't know  Not Irradiated  Not Applicable (if malignancy preceded LCH)

#### 6. Treatment (check all that apply)

Treatment?  N  Y If yes, specify

**Surgery**  N  Y

**Radiation**  N  Y If yes, specify

dosage applied (cGy):

Site / Field \_\_\_\_\_

dosage applied (cGy):

Site / Field \_\_\_\_\_

dosage applied (cGy):

Site / Field \_\_\_\_\_

**Chemotherapy**  N  Y If yes, specify

specify: \_\_\_\_\_

Starting date therapy:        
dd mm yy

Ending date last therapy:        
dd mm yy

#### 7. Duration of associated malignancy and follow-up

Remission  N  Y

Date of 1<sup>st</sup> remission:        
dd mm yy

Relapse  N  Y

N° relapses:

Date of 1<sup>st</sup> relapse:        
dd mm yy

#### Current status

#### 8. Current status

Date of last information:        
dd mm yy

Status:  A  D (A=Alive; D=Dead)

**If alive:** (check all that apply) Alive with LCH

Alive with malignancy

**If dead:** (check all that apply) Died with LCH

Died with malignancy

Died of intercurrent disease

Cause of death: \_\_\_\_\_

Notes

---

---

---

Date: \_\_\_\_\_

Signature: \_\_\_\_\_

---
